# Supplementary material
Source: publisher site journal article supplement (https://www.dovepress.com/article/474593)
Supplement: Supplementary file 1 [file get_supplementary_file.php]

Supplementary Materials for

**Predicting survival benefits after immune checkpoint inhibitor therapy in hepatocellular carcinoma patients using a machine learning approach with circulating biomarkers and clinical features**

Zhiyan Dai1#, Chao Chen2, 3#, Ziyan Zhou1,2, Mingzhen Zhou1,2, Zhengyao Xie1, Ziyao Liu1, Siyuan Liu1, Yiqiang Chen1, Jingjing Li1, Baorui Liu2*, Jie Shen1,2*

Corresponding authors: Jie Shen, shenjie2008nju@163.com; Baorui Liu, baoruiliu@nju.edu.cn.

**This Word file includes:**

Supplementary Figure 1 to 6.


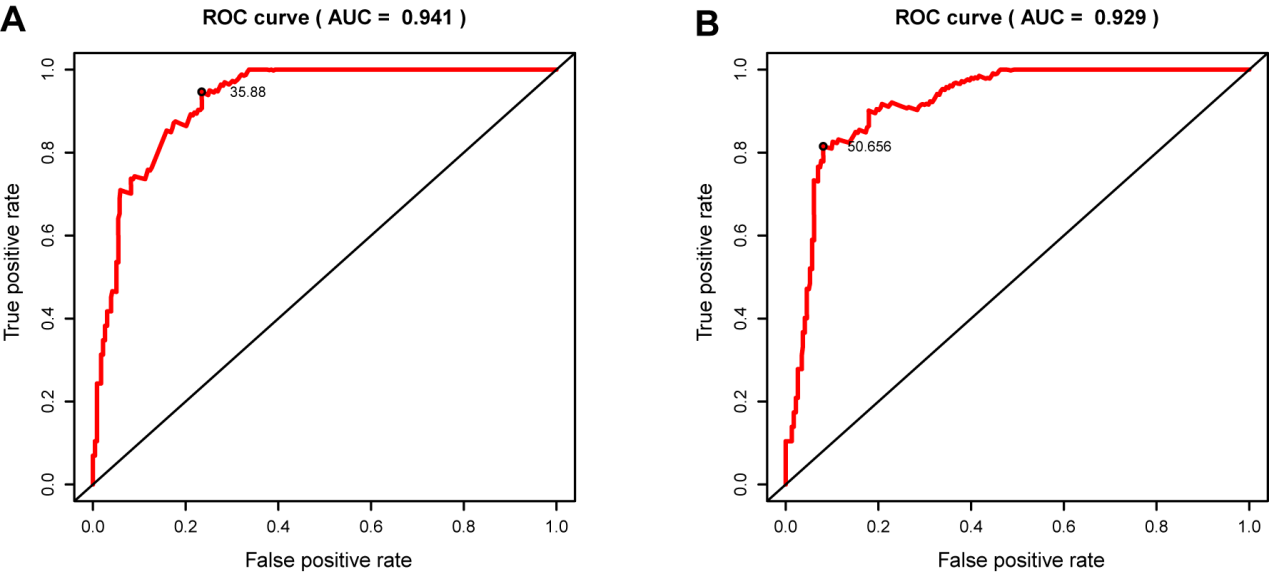


**Supplementary Figure 1 (A) ROC curve and cut point for model with circulating biomarkers only. (B) ROC curve and cut point for model with circulating biomarkers and clinical features. Abbreviations:** ROC, Receiver operating characteristic; AUC, area under the curve.


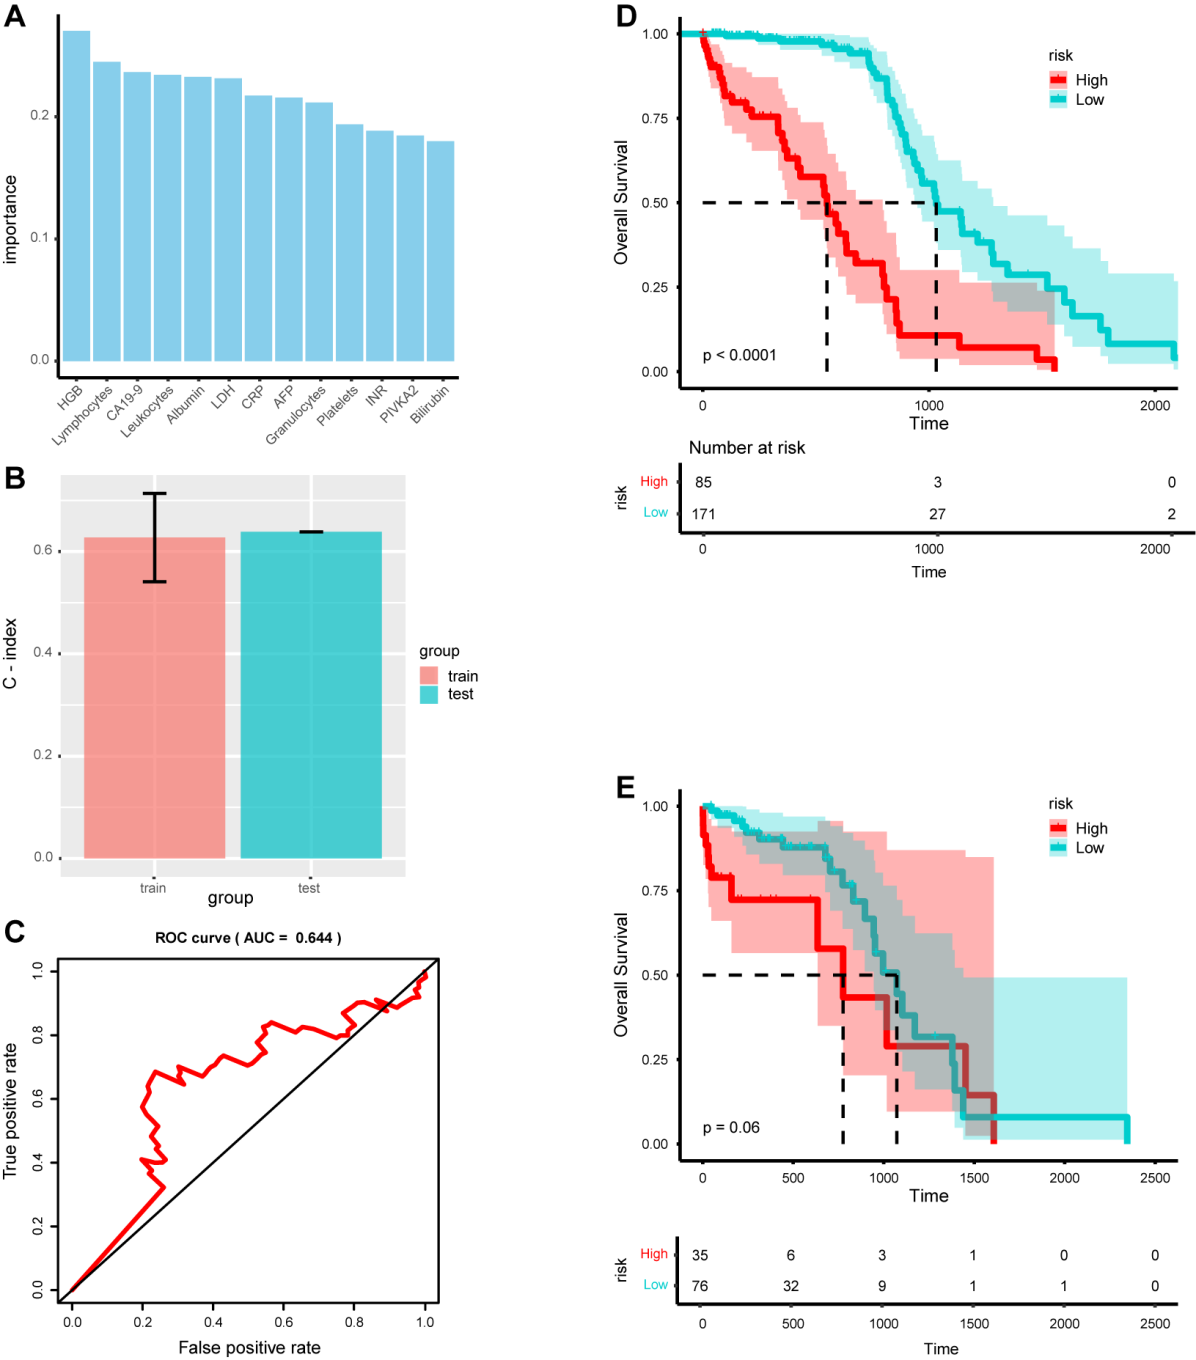


**Supplementary Figure 2 Performance of the model using biomarker level after treatment. (A) The importance of selected circulating biomarkers in the random forest model. Importance refers to the reciprocal of the minimal depth, which indicates how much influence the variable has on final decision. (B) C-index of the model for training and test cohorts. (C) ROC curve of the model on test cohort; Kaplan–Meier curves for overall survival of “high risk” and “low risk” groups for training (D) and test (E) set. The “high risk” and “low risk” groups were defined using cut-off value of risk score optimized by training set, the risk scores stand for risk of event occurrence. Abbreviations:** HGB, hemoglobin; LDH, lactate dehydrogenase; CRP, C-reactive protein; AFP, alpha-fetoprotein; INR, international normalized ratio; PIVKA-II, protein induced by vitamin K absence; ROC, Receiver operating characteristic; AUC, area under the curve.


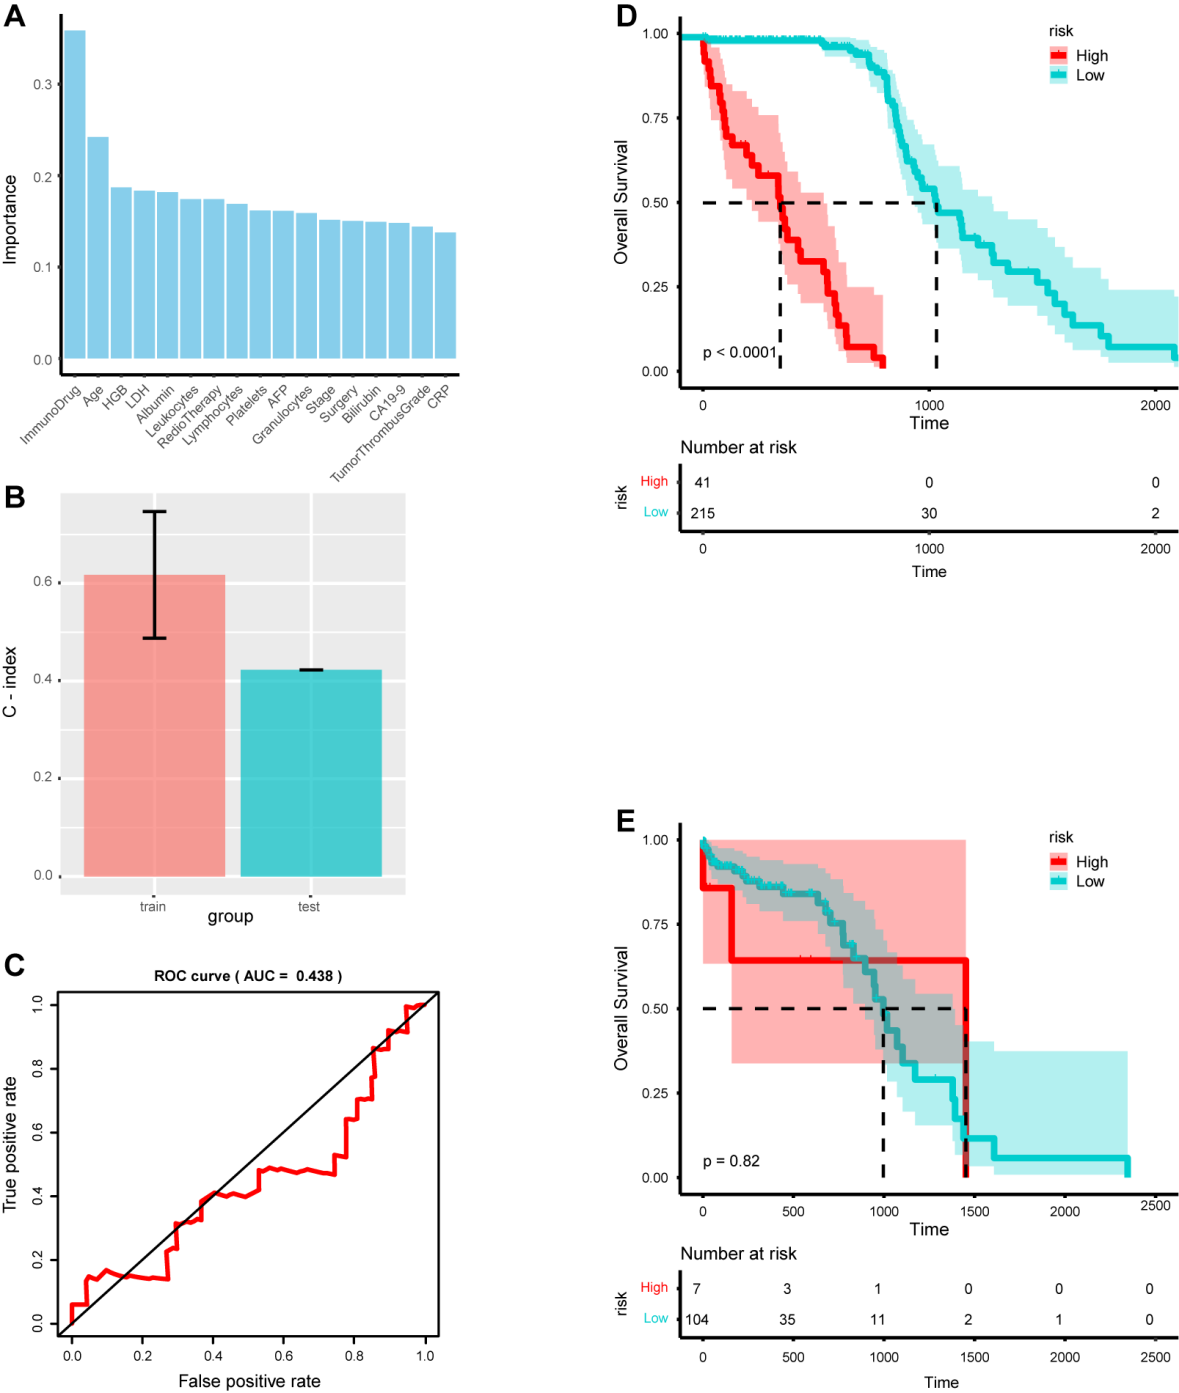


**Supplementary Figure 3 Performance of the model using biomarker level after treatment. (A) The importance of selected circulating biomarkers in the random forest model. Importance refers to the reciprocal of the minimal depth, which indicates how much influence the variable has on final decision. (B) C-index of the model for training and test cohorts. (C) ROC curve of the model on test cohort; Kaplan–Meier curves for overall survival of “high risk” and “low risk” groups for training (D) and test (E) set. The “high risk” and “low risk” groups were defined using cut-off value of risk score optimized by training set, the risk scores stand for risk of event occurrence. Abbreviations:** HGB, hemoglobin; LDH, lactate dehydrogenase; AFP, alpha-fetoprotein; CRP, C-reactive protein; ROC, Receiver operating characteristic; AUC, area under the curve.


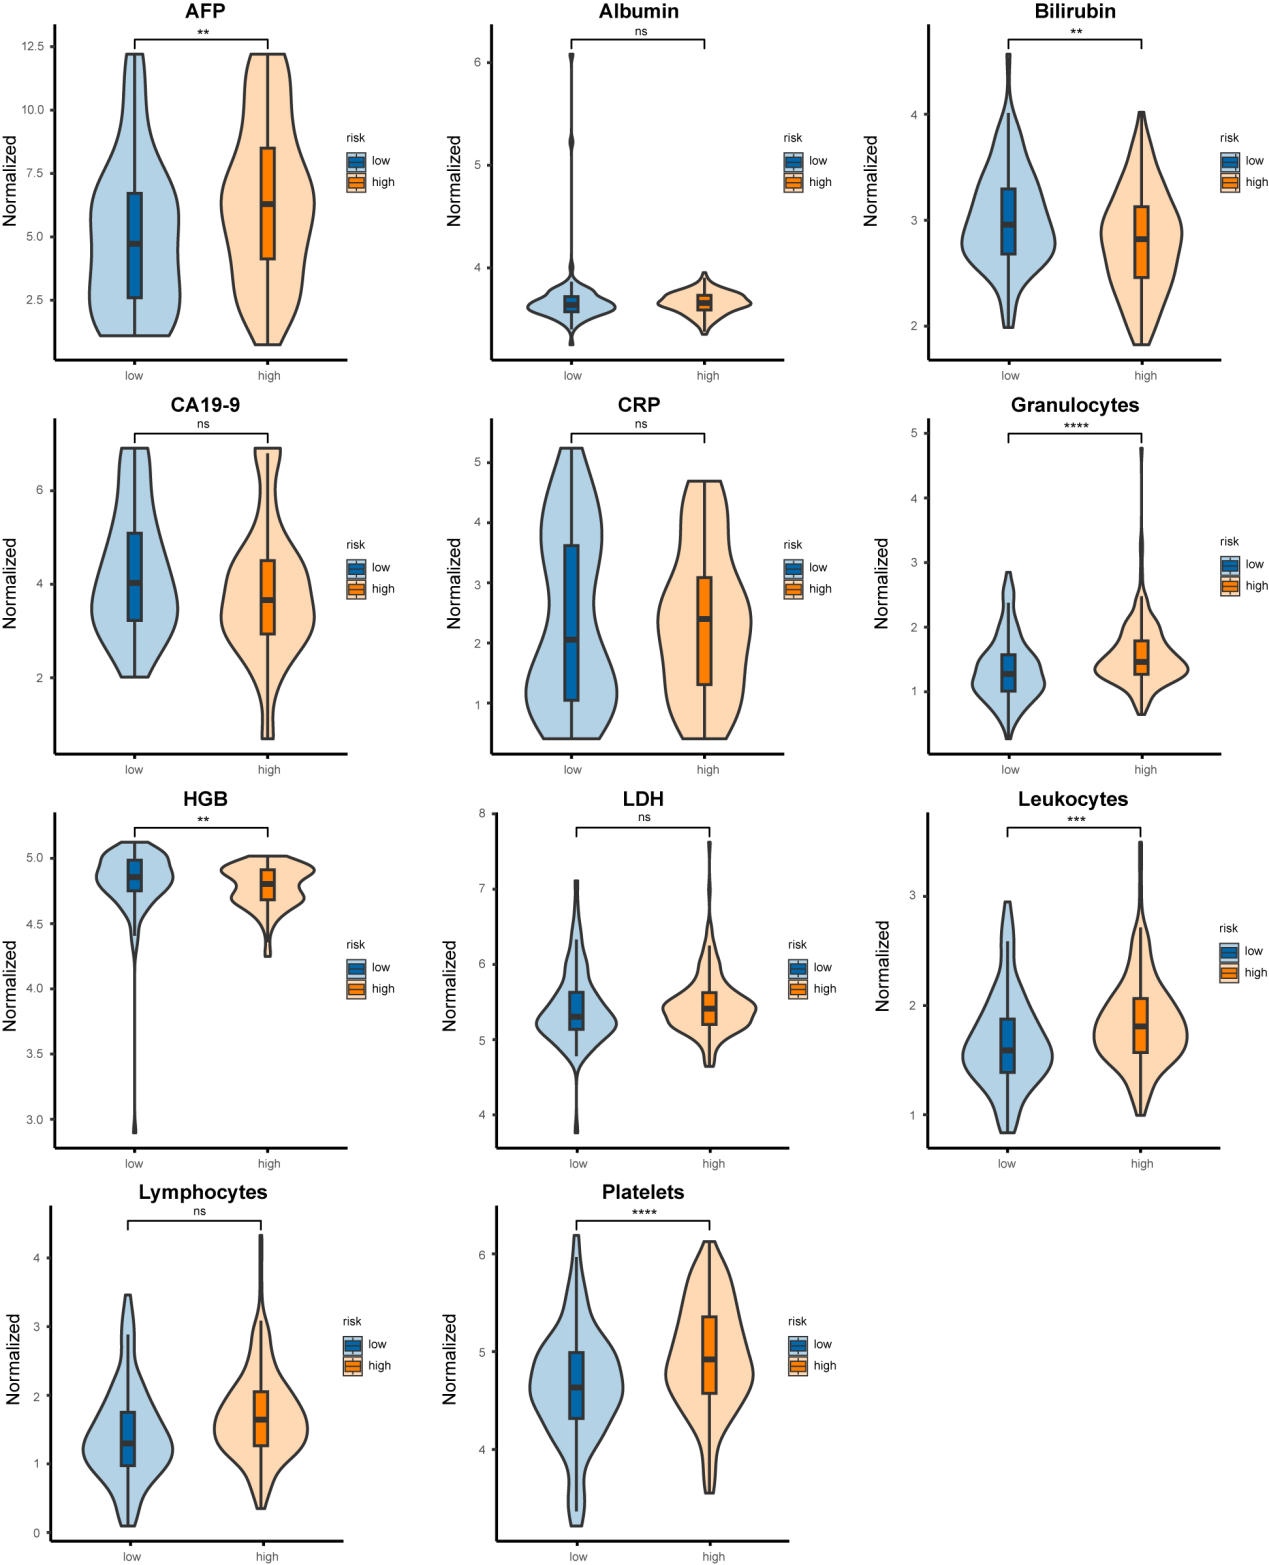


**Supplementary Figure 4 Differences of selected biomarkers level in high-risk and low-risk group in model with only circulating biomarkers. Abbreviations:** AFP, alpha-fetoprotein; CRP, C-reactive protein; HGB, hemoglobin; LDH, lactate dehydrogenase.


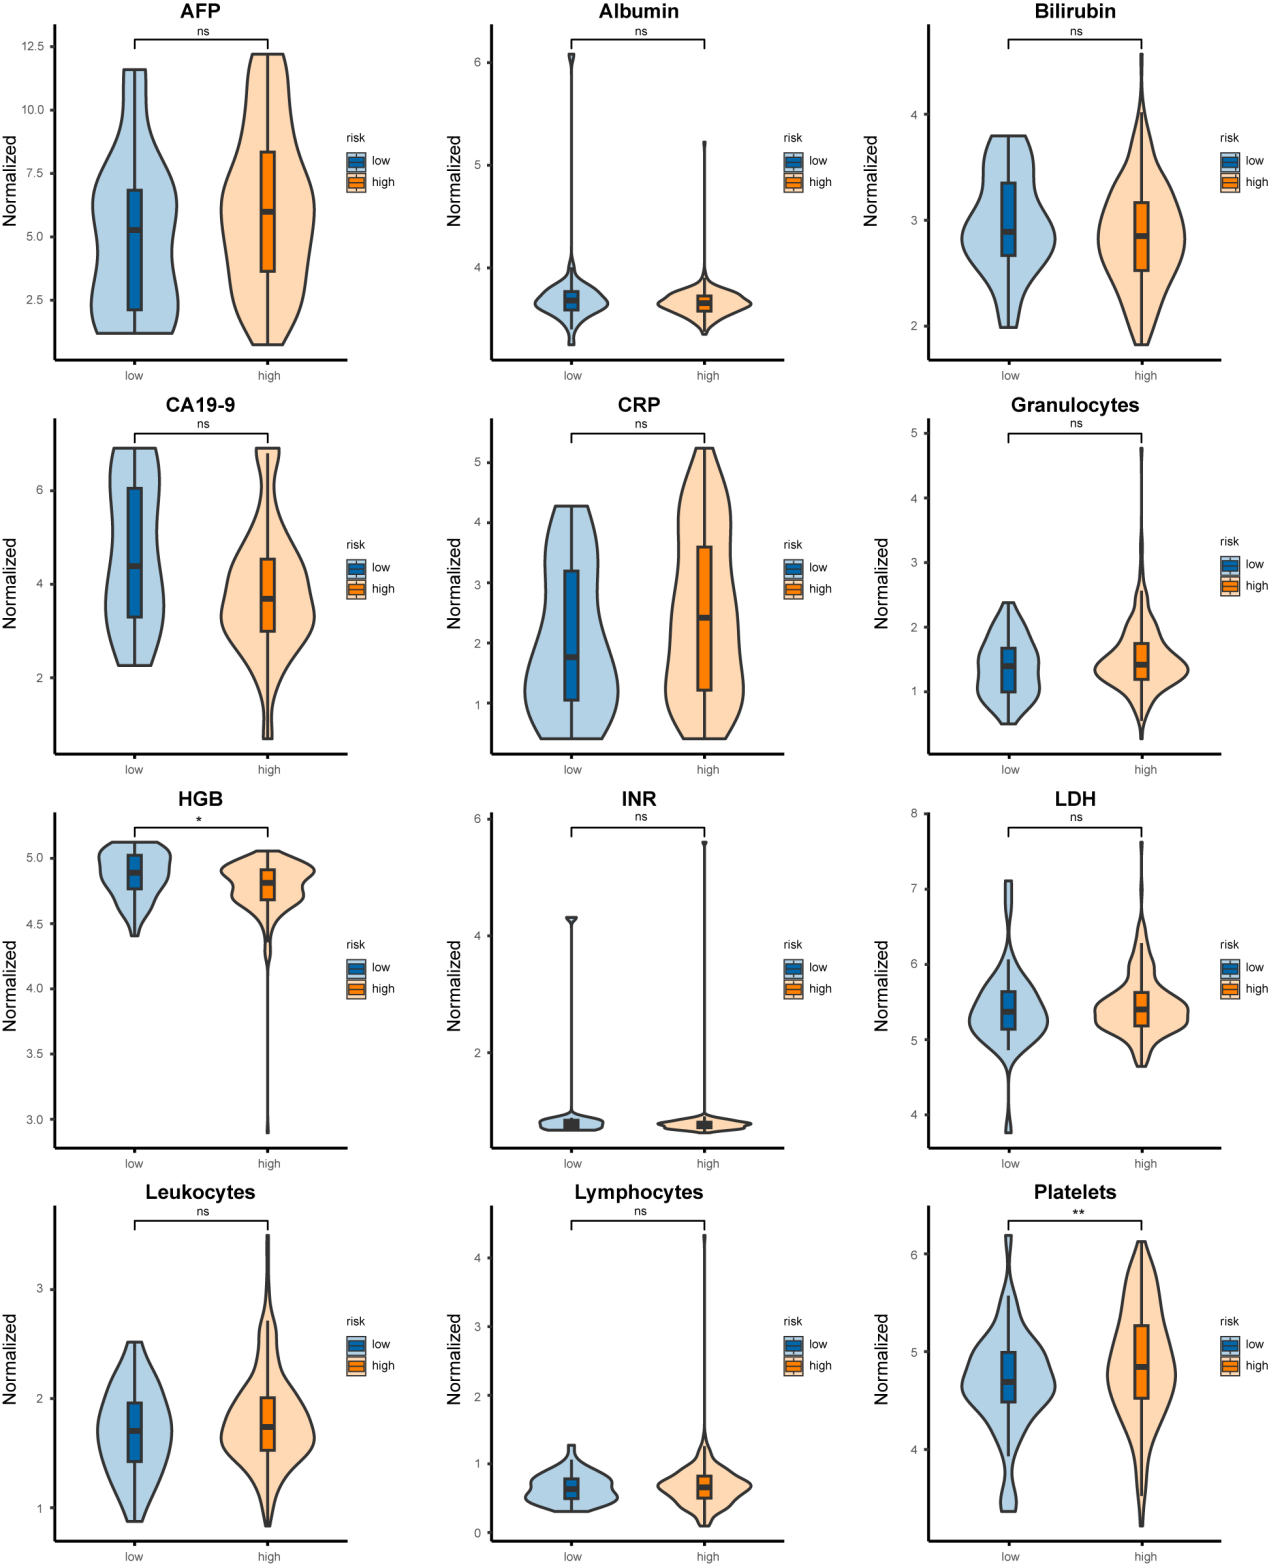


**Supplementary Figure 5 Differences of selected biomarkers level in high-risk and low-risk group in model with circulating biomarkers and clinical features.** **Abbreviations:** AFP, alpha-fetoprotein; CRP, C-reactive protein; HGB, hemoglobin; INR, international normalized ratio; LDH, lactate dehydrogenase.


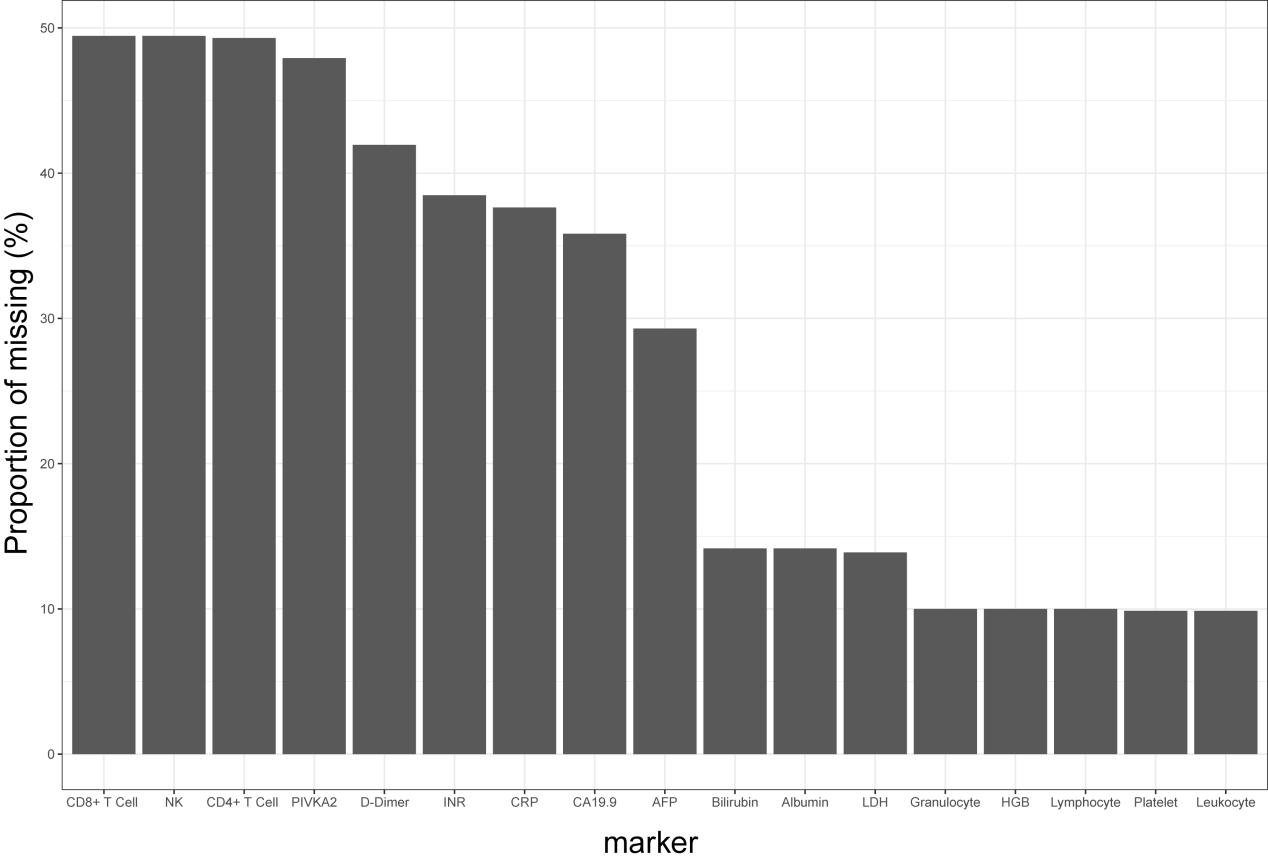


**Supplementary Figure 6 Proportion of missing value for baseline biomarker level. Abbreviations:** NK, natural killer; PIVKA, protein induced by vitamin K absence; INR, international normalized ratio; CRP, C-reactive protein; AFP, alpha-fetoprotein; LDH, lactate dehydrogenase; HGB, hemoglobin.
